# Supplementary material
Source: PubMed Central journal article supplement (PMC7577650)

# THE LANCET

## Neurology

### Supplementary appendix

This appendix formed part of the original submission. We post it as supplied by the authors.

Supplement to: Howard R, Burns A, Schneider L. Antipsychotic prescribing to people with dementia during COVID-19. *Lancet Neurol* 2020; **19**: 892.

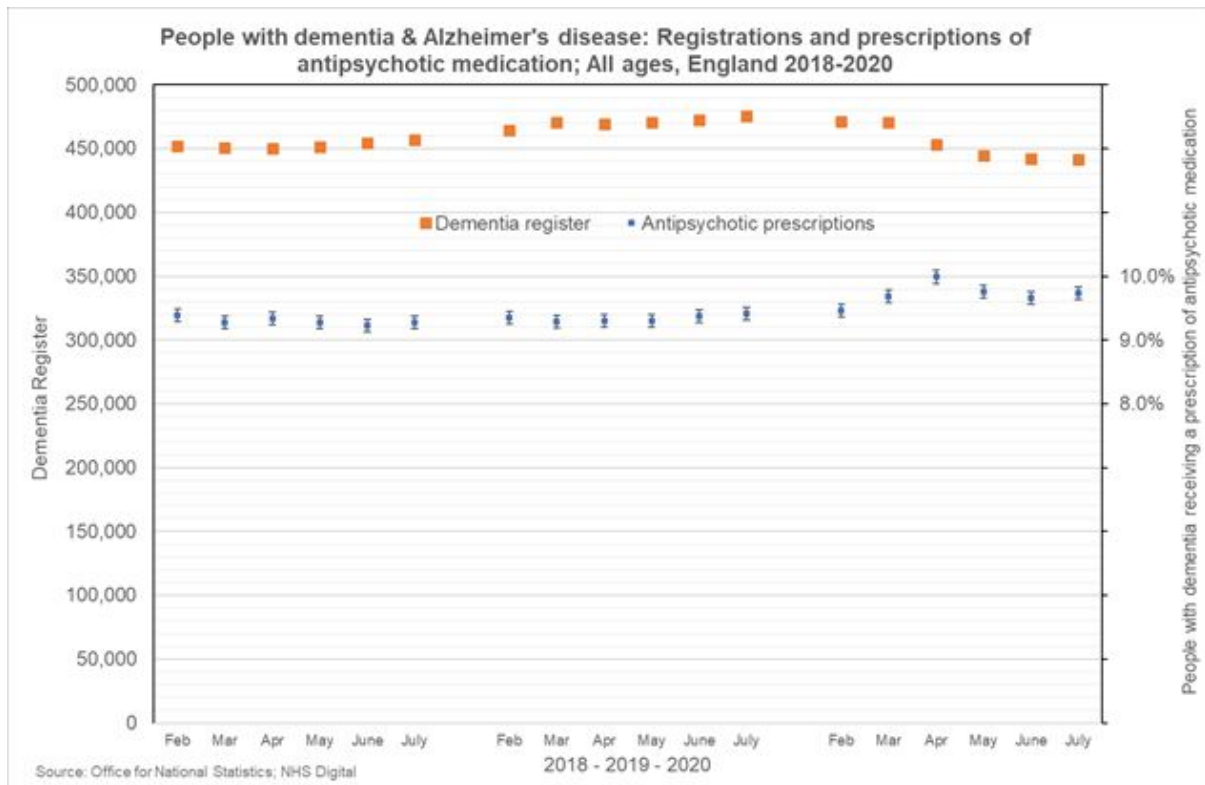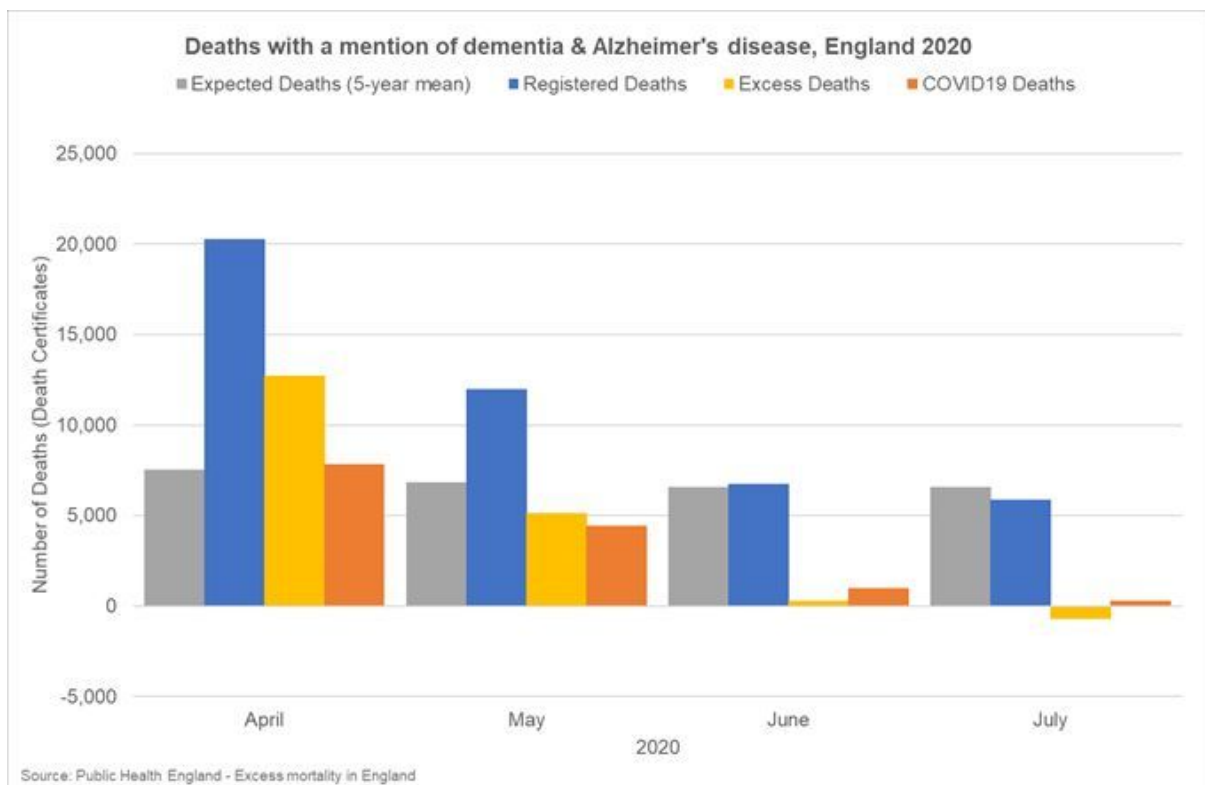

Supplement: mmc1.pdf [file mmc1.pdf]
